# Supplementary material for: Low MicroRNA-126 Levels in Right Ventricular Endomyocardial Biopsies Coincide With Cardiac Allograft Vasculopathy in Heart Transplant Patients
Source: PubMed Central journal article supplement — Transplant Direct. 2020 Apr 15;6(5):e549. doi: 10.1097/TXD.0000000000000995 (PMC7213604; doi:10.1097/txd.0000000000000995), 2020-04-15
Supplement: txd-6-e549-s001.pdf [file txd-6-e549-s001.pdf]

## SUPPLEMENTARY TABLES

**Table S1.** PCR product specifications.

**Table S2.** Detailed material information.

**Table S1. PCR product specifications.**

| Gene       | Assay ID or Sequence ID | System specification                             |
|------------|-------------------------|--------------------------------------------------|
| miR-126-3p | ID 002228               | TaqMan MicroRNA Assay, Applied Biosystems        |
| miR-126-5p | ID 000451               | TaqMan MicroRNA Assay, Applied Biosystems        |
| miR-628-5p | ID 002433               | TaqMan MicroRNA Assay, Applied Biosystems        |
| miR-92a-3p | ID 000431               | TaqMan MicroRNA Assay, Applied Biosystems        |
| U6         | ID 001973               | TaqMan MicroRNA Assay, Applied Biosystems        |
| VCAM1      | Hs1003372_m1            | TaqMan Gene Expression Assay, Applied Biosystems |
| PIK3R2     | Hs00178181_m1           | TaqMan Gene Expression Assay, Applied Biosystems |
| SPRED1     | Hs01084559_m1           | TaqMan Gene Expression Assay, Applied Biosystems |
| DLK1       | Hs00171584_m1           | TaqMan Gene Expression Assay, Applied Biosystems |
| GAPDH      | Hs99999905_m1           | TaqMan Gene Expression Assay, Applied Biosystems |

**Table S2. Detailed material information**

| Procedure                   | Name of kit                                      | Company            | Country | Catalog number |
|-----------------------------|--------------------------------------------------|--------------------|---------|----------------|
| microRNA and RNA extraction | miRVANA miRNA isolation kit                      | Ambion             | USA     | AM1560         |
| microRNA cDNA synthesis     | TaqMan MicroRNA Reverse Transcription Kit        | Applied Biosystems | USA     | 4366596        |
| mRNA cDNA synthesis         | High-Capacity cDNA Reverse Transcription Kit     | Applied Biosystems | USA     | 4368813        |
| microRNA cDNA amplification | TaqMan Universal Master Mix II, no UNG           | Applied Biosystems | USA     | 4440047        |
| mRNA cDNA amplification     | TaqMan Universal PCR Master Mix, no AmpErase UNG | Applied Biosystems | USA     | 4364341        |

## **HIGHLIGHTS**

- Cardiac allograft vasculopathy coincides with lower miR-126a-3p levels in endomyocardial biopsies of heart transplant recipients.
- MiR-126 and its targets are influenced by the administration of immunosuppressive agents in human microvascular cardiac endothelial cells.
- The use of microRNA or other biomarkers can be of added value to detect cardiac allograft vasculopathy thereby avoiding invasive angiography.
